# Supplementary material for: Temporal Dynamics in Rumen Bacterial Community Composition of Finishing Steers during an Adaptation Period of Three Months
Source: PubMed Central journal article supplement (PMC6843415; doi:10.3390/microorganisms7100410), 2019-10-01
Supplement: microorganisms-07-00410-s001.pdf [file microorganisms-07-00410-s001.pdf]

**Supplementary Materials**

**Table S1.** Basic sample and sequencing information

| <b>Sample ID <sup>1</sup></b> | <b>Steers ID</b> | <b>Raw reads</b> | <b>Quality filtered reads</b> | <b>Ambiguous bases</b> |
|-------------------------------|------------------|------------------|-------------------------------|------------------------|
| C11                           | S1682            | 65508            | 64884                         | 124                    |
| C12                           | S1603            | 108582           | 107328                        | 229                    |
| C13                           | S1638            | 102092           | 101198                        | 235                    |
| C14                           | S1662            | 102802           | 101288                        | 230                    |
| C15                           | S1661            | 91512            | 90310                         | 174                    |
| L11                           | S1689            | 102180           | 101274                        | 242                    |
| L12                           | S1635            | 112804           | 111474                        | 234                    |
| L13                           | S1627            | 116848           | 115712                        | 298                    |
| L14                           | S1626            | 103056           | 102140                        | 292                    |
| L15                           | S1675            | 58404            | 57704                         | 114                    |
| C21                           | S1682            | 50894            | 50318                         | 121                    |
| C22                           | S1603            | 84512            | 83516                         | 143                    |
| C23                           | S1638            | 70058            | 69318                         | 179                    |
| C24                           | S1662            | 52530            | 51852                         | 145                    |
| C25                           | S1661            | 46358            | 46000                         | 64                     |
| L21                           | S1689            | 48866            | 48496                         | 70                     |
| L22                           | S1635            | 104894           | 104214                        | 237                    |
| L23                           | S1627            | 51724            | 51264                         | 91                     |
| L24                           | S1626            | 51572            | 51090                         | 106                    |
| L25                           | S1675            | 80518            | 79648                         | 201                    |
| C31                           | S1682            | 43400            | 43092                         | 86                     |
| C32                           | S1603            | 117544           | 116632                        | 238                    |
| C33                           | S1638            | 83284            | 82094                         | 162                    |
| C34                           | S1662            | 108064           | 106238                        | 290                    |
| C35                           | S1661            | 50712            | 50136                         | 121                    |
| L31                           | S1689            | 46040            | 45794                         | 131                    |
| L32                           | S1635            | 54156            | 53848                         | 96                     |
| L33                           | S1627            | 80904            | 80112                         | 188                    |
| L34                           | S1626            | 141964           | 138864                        | 36                     |
| L35                           | S1675            | 84268            | 83312                         | 209                    |

<sup>1</sup>C = standard energy and standard protein diet, C11 indicates the first animal in the first month of C diet, C21 indicates the first animal in the second month of C diet, C31 indicates the first animal in the third month of C diet, the same pattern for other Sample ID in C diet; L = low energy and low protein diet, L11 indicates the first animal in the first month of L diet, L21 indicates the first animal in the second month of L diet, L31 indicates the first animal in the third month of L diet, the same pattern for other Sample ID in L diet.

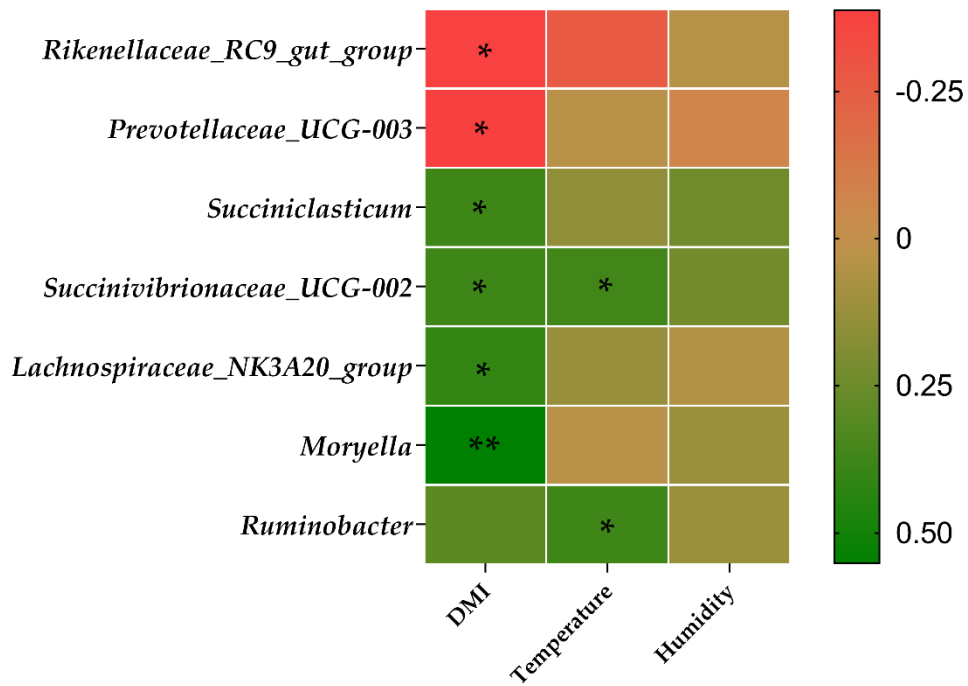

Figure S1: Correlations between rumen genera and DMI, temperature and humidity. One asterisk (\*) within each cell indicates  $0.01 \leq p < 0.05$ , two asterisks (\*\*) within each cell indicate  $p < 0.01$ , and no asterisk within each cell indicates  $p \geq 0.05$ .

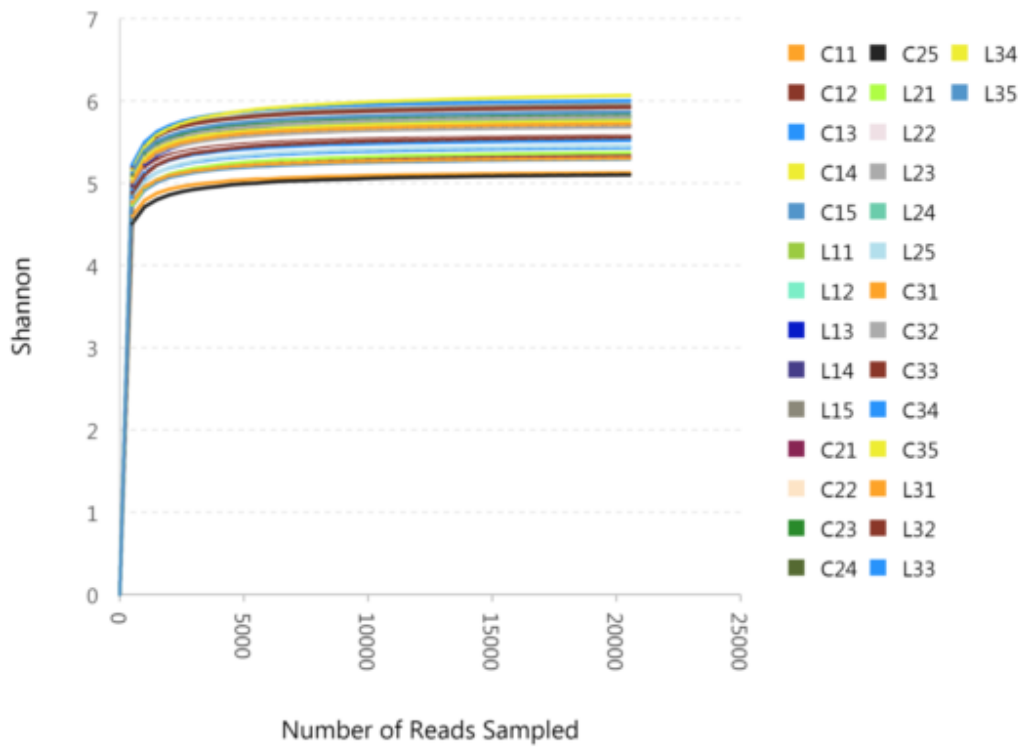

Figure S2: Shannon–Wiener curves based on Shannon index for standard energy and standard protein diet (C) and low energy and low protein diet (L).

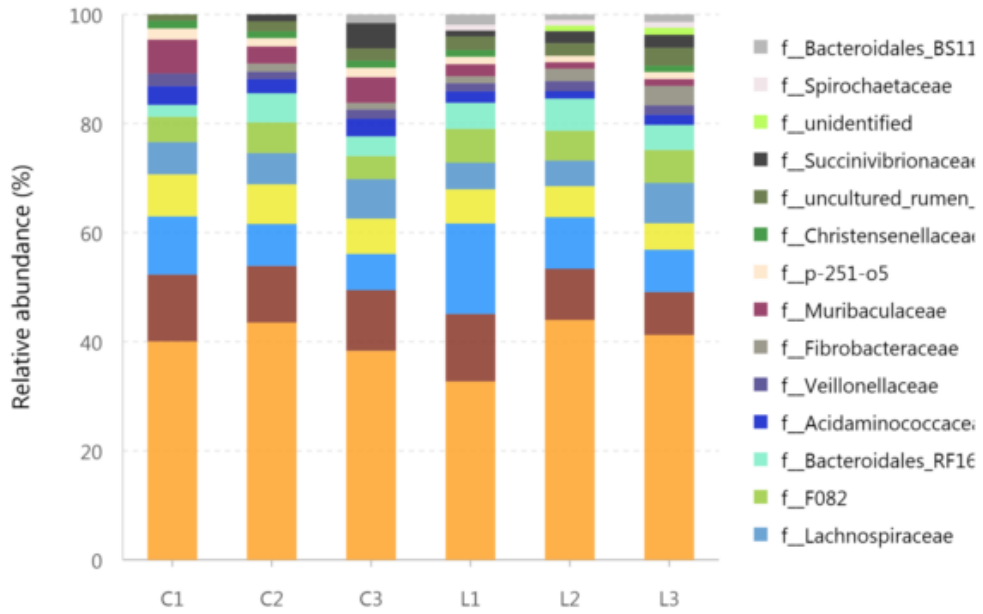

Figure S3: Relative abundance at family level in standard energy and standard protein diet (C) and low energy and low protein diet (L). C1 indicates rumen samples collected from the first month in C diet, C2 indicates rumen samples collected from the second month in C diet, and C3 indicates rumen samples collected from the third month in C diet, the same pattern is for L diet.
